# Supplementary material for: Probing the electronic structure and spectroscopy of pyrrolyl and imidazolyl radicals using high-resolution photoelectron imaging of cryogenically cooled anions
Source: Royal Society of Chemistry journal article supplement (doi:10.1039/d2cp00189f), 2022-01-01
Supplement: d2cp00189f1.pdf [file d2cp00189f1.pdf]

## Supporting Information

### Probing the Electronic Structure and Spectroscopy of the Pyrrolyl and Imidazolyl Radicals using High-Resolution Photoelectron Imaging of Cryogenically-Cooled Anions

Yue-Rou Zhang<sup>‡</sup>, Dao-Fu Yuan<sup>‡</sup>, and Lai-Sheng Wang

Department of Chemistry, Brown University, Providence, Rhode Island 02912, USA. E-mail: Lai-Sheng\_Wang@brown.edu

<sup>‡</sup> Equal contribution.

#### Table of Contents

|                            |   |
|----------------------------|---|
| 1. Experimental Procedures | 2 |
| 2. Supplementary Figures   | 3 |
| 3. Supplementary Tables    | 7 |

# 1 Experimental Procedures

## 1.1 Experimental methods

The experiment was carried out using our third-generation ESI-PES apparatus.<sup>1</sup> The pyrrole and imidazole samples were purchased from Sigma-Aldrich with a specified purity (98% for pyrrole and 99% for imidazole) and used without further purification. The pyrrolide or imidazolide anions were produced by electrospray of a 1 mM solution of pyrrole or imidazole in a mixed solvent of CH<sub>3</sub>OH/H<sub>2</sub>O (9:1 volume ratio) at pH~10. Anions generated in the ESI source<sup>2</sup> were guided by a set of quadrupole and octupole ion guides into a cryogenically-cooled 3D Paul trap operated at 4.6 K.<sup>3</sup> After being accumulated for about 0.1 s and thermally cooled via collisions with 1 mTorr He/H<sub>2</sub> (4/1 volume) background gas, the anions were pulsed out of the trap at a repetition rate of 10 Hz, and entered the extraction zone of a time-of-flight mass spectrometer. The pyrrolide and imidazolide anions were selected by a mass gate and then photodetached in the interaction zone of a velocity-map imaging lens<sup>4</sup> by a Nd:YAG laser or a tunable dye laser. The propagation and polarization directions of the detachment laser were parallel to the imaging plane. Photoelectrons were projected onto a pair of 75-mm diameter micro-channel plates coupled to a phosphor screen and captured by a charge-coupled-device camera. The PE images were inverted using pBASEX<sup>5</sup> and BASEX.<sup>6</sup> The PE spectra were calibrated with the known spectra of Au<sup>-</sup> at different photon energies. The kinetic energy (KE) resolution was 3.8 cm<sup>-1</sup> for electrons with 55 cm<sup>-1</sup> KE and 1.5% ( $\Delta KE/KE$ ) for KE above 1 eV in the current experiment.

## 1.2 Calculation methods

Geometry optimization and ground-state electronic structure calculations were performed using density functional theory (DFT) at the B3LYP/6-311++(d,p) level of theory. The electronic structure calculations were followed by vibrational analyses. All electronic structure calculations were performed using Gaussian 09.<sup>7</sup> Franck-Condon factor calculations were carried out using the FC-Lab2 program.<sup>8</sup>

## 2 Supplementary Figures

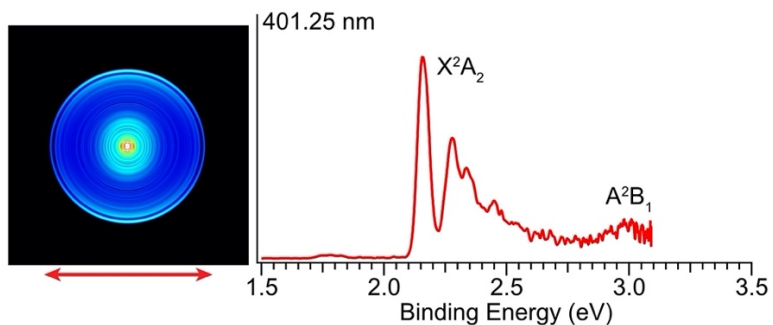

**Fig. S1** Photoelectron image and spectrum of the pyrrolide anion at 401.25 nm (3.0900 eV). The weak feature around 1.75 eV is due to the presence of a small amount of the 2-pyrrolide isomer. The double arrow indicates the polarization direction of the detachment laser.

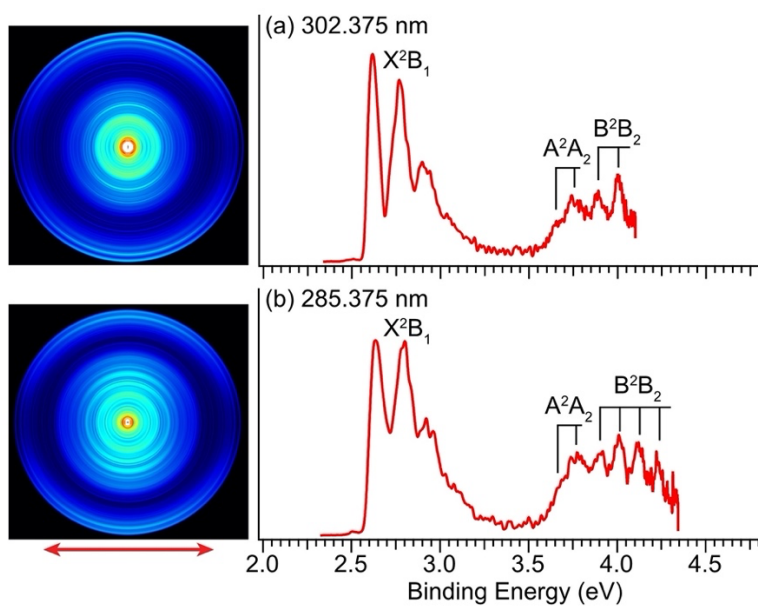

**Fig. S2** Photoelectron images and spectra of the imidazolidine anion at (a) 302.375 nm (4.1003 eV) and (b) 285.375 nm (4.3446 eV). The double arrow indicates the polarization direction of the detachment laser.

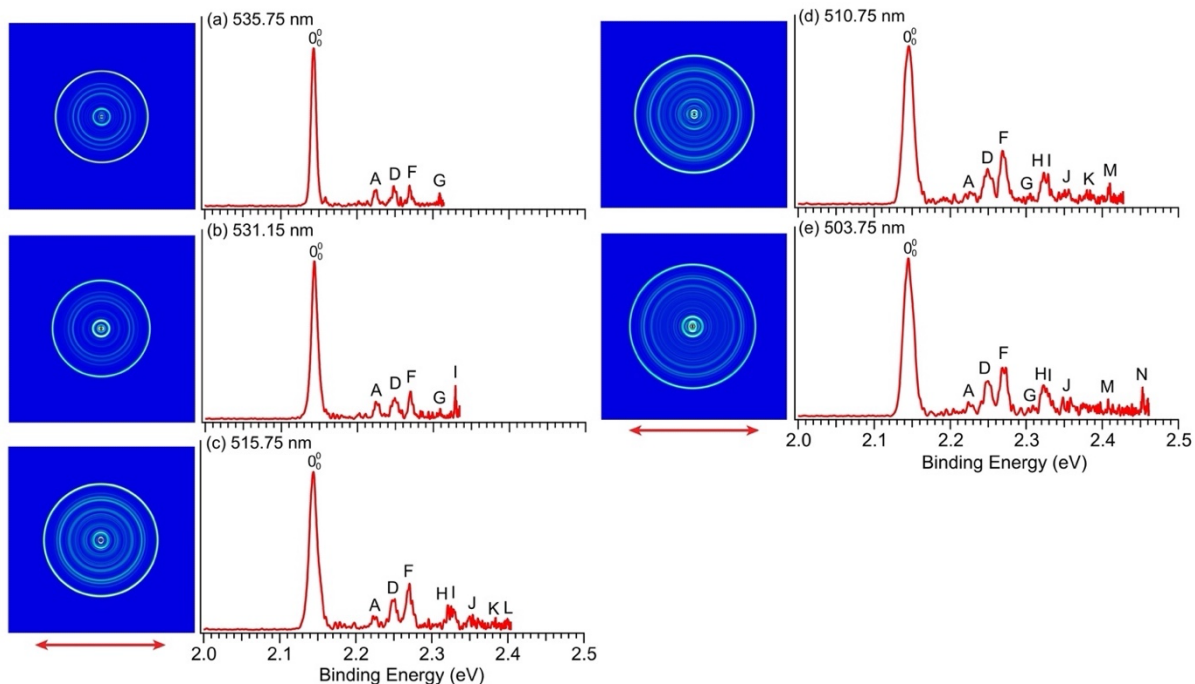

**Fig. S3** Photoelectron images and spectra of the pyrrolyl anion at (a) 535.75 nm (2.3142 eV), (b) 531.15 nm (2.3343 eV), (c) 515.75 nm (2.4040 eV), (d) 510.75 nm (2.4275 eV) and (e) 503.75 nm (2.4612 eV). The double arrows indicate the polarization direction of the detachment laser.

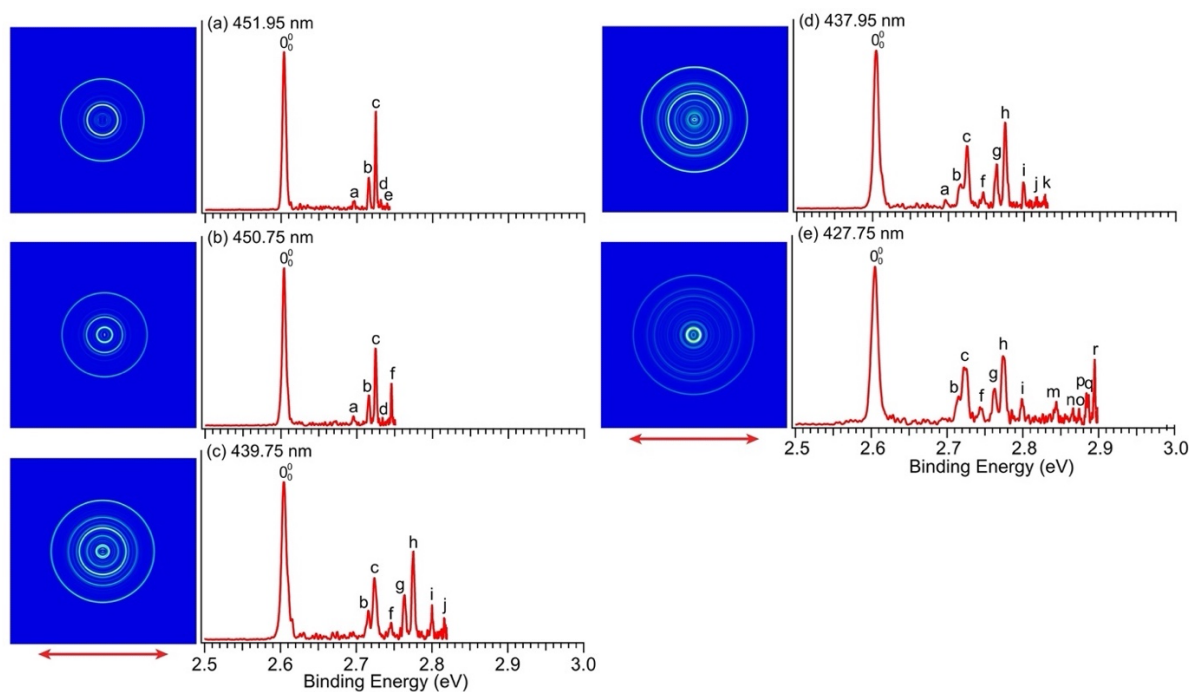

**Fig. S4** Photoelectron images and spectra of the imidazolide anion at (a) 451.95 nm (2.7433 eV), (b) 450.75 nm (2.7506 eV), (c) 439.75 nm (2.8194 eV), (d) 437.95 nm (2.8310 eV) and (e) 427.75 nm (2.8985 eV). The double arrows indicate the polarization direction of the detachment laser.

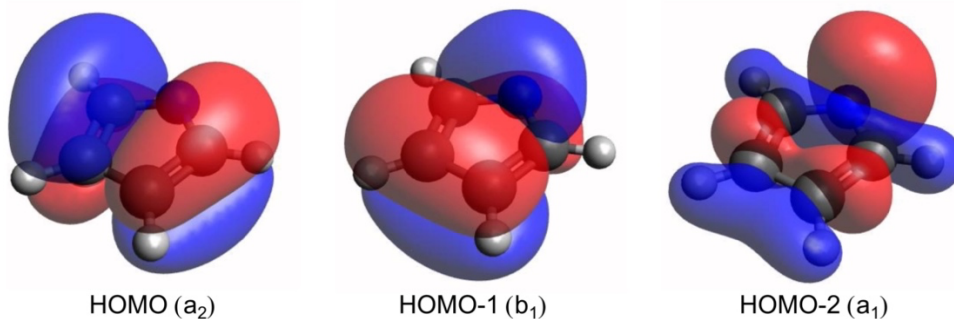

**Fig. S5** The valence molecular orbitals of the pyrrolide anion (isovalue = 0.02).

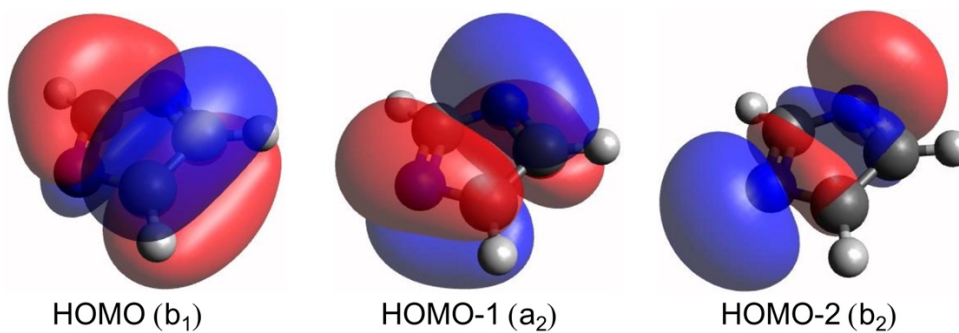

**Fig. S6** The valence molecular orbitals of the imidazolide anion (isovalue = 0.02).

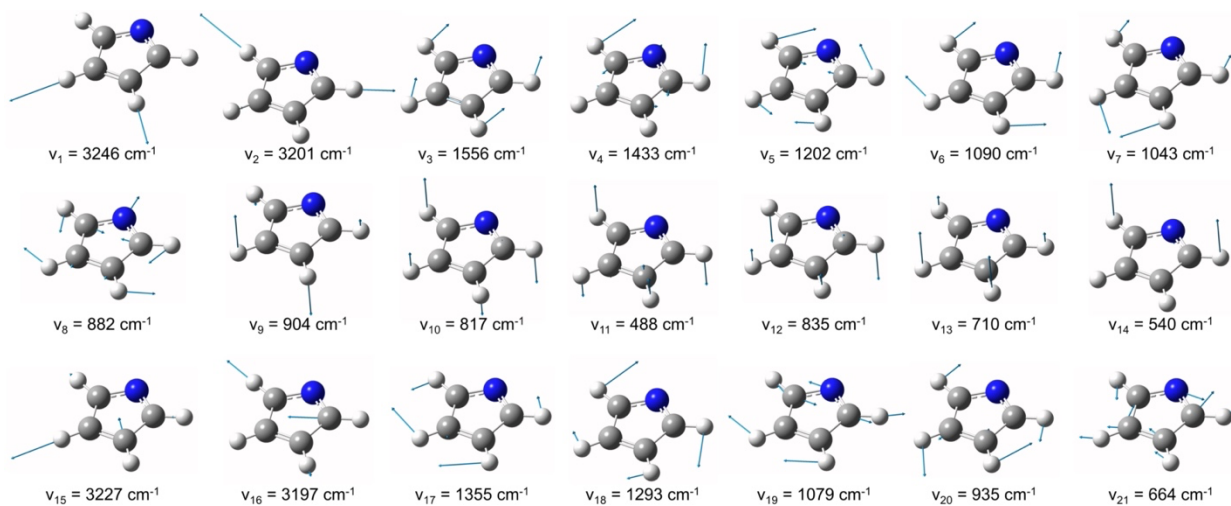

**Fig. S7** The atomic displacement vectors of the vibrational modes for pyrrolyl. The frequencies are shown below for each mode.

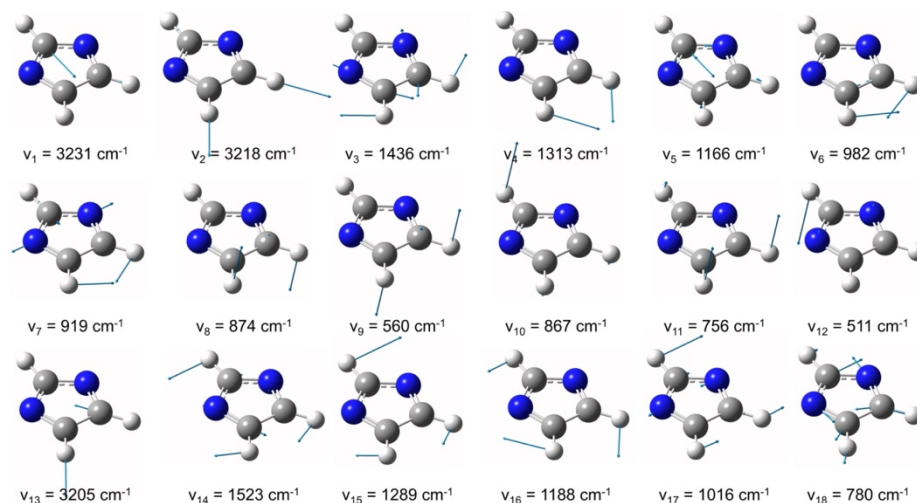

**Fig. S8** The atomic displacement vectors of the vibrational modes for imidazolyl. The frequencies are shown below for each mode.

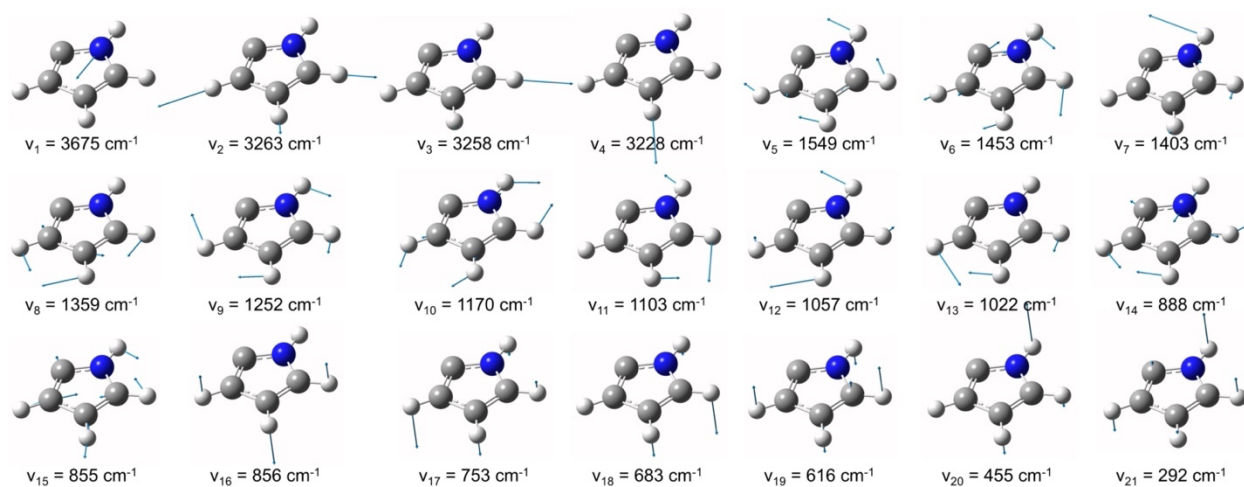

**Fig. S9** The atomic displacement vectors of the vibrational modes for 2-pyrrolyl. The frequencies are shown below for each mode.

### 3 Supplementary Tables

**Table S1.** The observed features for the 2-pyrrolide anion, with their binding energies (BEs), shifts relative to the 0–0 transition, asymmetry parameters ( $\beta$ ), and assignments, compared with theoretical frequencies ( $\omega$ ).

| Observed peak                             | BE (eV) <sup>a</sup> | BE (cm <sup>-1</sup> ) <sup>a</sup> | Shift (cm <sup>-1</sup> ) | $\beta$ | Assignment                       | $\omega$ (cm <sup>-1</sup> ) <sup>b</sup> | $\omega$ (cm <sup>-1</sup> ) <sup>c</sup> |
|-------------------------------------------|----------------------|-------------------------------------|---------------------------|---------|----------------------------------|-------------------------------------------|-------------------------------------------|
| <sup>x</sup> 0 <sub>0</sub> <sup>0'</sup> | 1.6990(30)           | 13703(24)                           | 0                         | -0.2    | 0-0 of ground state              |                                           |                                           |
| <sup>A</sup> 0 <sub>0</sub> <sup>0'</sup> | 1.7170(53)           | 13849(43)                           | 146                       | 0.1     | 0-0 of first excited state       |                                           |                                           |
| <sup>x</sup> 1'                           | 1.7321(44)           | 13970(35)                           | 267                       | -0.4    | 21 <sup>1</sup>                  | 292                                       | 325.8                                     |
| <sup>x</sup> 2'                           | 1.7542(53)           | 14149(43)                           | 446                       | -0.5    | 20 <sup>1</sup>                  | 455                                       | 499.3                                     |
| <sup>x</sup> 3'                           | 1.7656(60)           | 14241(48)                           | 538                       |         | 21 <sup>2</sup>                  | 584                                       | 651.6                                     |
| <sup>x</sup> 4'                           | 1.7824(33)           | 14376(27)                           | 673                       | -0.5    | 18 <sup>1</sup>                  | 683                                       | 695.7                                     |
| <sup>x</sup> 5'                           | 1.8034(54)           | 14545(44)                           | 842                       | -0.4    | 15 <sup>1</sup> /16 <sup>1</sup> | 855/856                                   | 846.0/842.0                               |
| <sup>x</sup> 6'                           | 1.8319(36)           | 14775(29)                           | 1072                      | -0.4    | 12 <sup>1</sup>                  | 1057                                      | 1060.2                                    |

<sup>a</sup>The numbers in the parentheses indicate the experimental uncertainties in the last digit.

<sup>b</sup>The frequencies are calculated at the B3LYP/6-311++G\*\* level of theory (see Figure S9 and Table S6).

<sup>c</sup>From reference 9, calculated at the fc-CCSD(T)/ANO level of theory.

**Table S2.** The observed vibrational modes and their frequencies for pyrrolyl from the current work, in comparison with the calculated values.

| vibrational mode | symmetry       | $\omega$ (exp) (cm <sup>-1</sup> ) <sup>a</sup> | $\omega$ (theo) (cm <sup>-1</sup> ) <sup>b</sup> | $\omega$ (theo) (cm <sup>-1</sup> ) <sup>c</sup> |
|------------------|----------------|-------------------------------------------------|--------------------------------------------------|--------------------------------------------------|
| v <sub>21</sub>  | b <sub>2</sub> | 656 (7)                                         | 664                                              | 668.3                                            |
| v <sub>13</sub>  | b <sub>1</sub> | 688 (7)                                         | 710                                              | 700.9                                            |
| v <sub>10</sub>  | a <sub>2</sub> | 808 (12)                                        | 817                                              | 815.0                                            |
| v <sub>9</sub>   | a <sub>2</sub> | 890 (8)                                         | 904                                              | 885.3                                            |
| v <sub>8</sub>   | a <sub>1</sub> | 844 (8)                                         | 882                                              | 869.5                                            |
| v <sub>7</sub>   | a <sub>1</sub> | 1018 (11)                                       | 1043                                             | 1039.1                                           |
| v <sub>5</sub>   | a <sub>1</sub> | 1224 (12)                                       | 1202                                             | 1188.6                                           |
| v <sub>4</sub>   | a <sub>1</sub> | 1446 (10)                                       | 1433                                             | 1447.3                                           |

<sup>a</sup>The numbers in the parentheses indicate the experimental uncertainties in the last digit.

<sup>b</sup>The theoretical frequencies are calculated at the B3LYP/6-311++G\*\* level of theory. See Table S4.

<sup>c</sup>From ref. 9, calculated at the fc-CCSD(T)/ANO level of theory.

**Table S3.** The observed vibrational modes and their frequencies for imidazolyl from the current work, in comparison with the calculated values.

| vibrational mode | symmetry       | $\omega$ (exp)<br>( $\text{cm}^{-1}$ ) <sup>a</sup> | $\omega$ (theo)<br>( $\text{cm}^{-1}$ ) <sup>b</sup> |
|------------------|----------------|-----------------------------------------------------|------------------------------------------------------|
| v <sub>18</sub>  | b <sub>2</sub> | 786(5)                                              | 780                                                  |
| v <sub>12</sub>  | b <sub>1</sub> | 512(6)                                              | 511                                                  |
| v <sub>11</sub>  | b <sub>1</sub> | 740(6)                                              | 756                                                  |
| v <sub>9</sub>   | a <sub>2</sub> | 545(6)                                              | 560                                                  |
| v <sub>8</sub>   | a <sub>2</sub> | 852(6)                                              | 874                                                  |
| v <sub>7</sub>   | a <sub>1</sub> | 898(6)                                              | 919                                                  |
| v <sub>6</sub>   | a <sub>1</sub> | 969(6)                                              | 982                                                  |
| v <sub>5</sub>   | a <sub>1</sub> | 1139(6)                                             | 1166                                                 |
| v <sub>4</sub>   | a <sub>1</sub> | 1284(6)                                             | 1313                                                 |
| v <sub>3</sub>   | a <sub>1</sub> | 1378(6)                                             | 1436                                                 |

<sup>a</sup>The numbers in the parentheses indicate the experimental uncertainties in the last digit.

<sup>b</sup>The theoretical frequencies are calculated at the B3LYP/6-311++G\*\* level of theory (see Table S7). These data are the same as those reported in ref. 10 computed at the same level of theory.

**Table S4.** The theoretical frequencies of pyrrolyl.

| Symmetry | Mode            | $\omega$ ( $\text{cm}^{-1}$ ) <sup>a</sup> | $\omega$ ( $\text{cm}^{-1}$ ) <sup>b</sup> |
|----------|-----------------|--------------------------------------------|--------------------------------------------|
| a1       | v <sub>1</sub>  | 3246                                       | 3275.1                                     |
|          | v <sub>2</sub>  | 3201                                       | 3230.7                                     |
|          | v <sub>3</sub>  | 1556                                       | 1549.1                                     |
|          | v <sub>4</sub>  | 1433                                       | 1447.3                                     |
|          | v <sub>5</sub>  | 1202                                       | 1188.6                                     |
|          | v <sub>6</sub>  | 1090                                       | 1084.2                                     |
|          | v <sub>7</sub>  | 1043                                       | 1039.1                                     |
|          | v <sub>8</sub>  | 882                                        | 869.5                                      |
| a2       | v <sub>9</sub>  | 904                                        | 885.3                                      |
|          | v <sub>10</sub> | 817                                        | 815.0                                      |
|          | v <sub>11</sub> | 488                                        | 488.7                                      |
| b1       | v <sub>12</sub> | 835                                        | 815.6                                      |
|          | v <sub>13</sub> | 710                                        | 700.9                                      |
|          | v <sub>14</sub> | 540                                        | 541.0                                      |
| b2       | v <sub>15</sub> | 3227                                       | 3254.2                                     |
|          | v <sub>16</sub> | 3197                                       | 3226.2                                     |
|          | v <sub>17</sub> | 1355                                       | 1349.0                                     |
|          | v <sub>18</sub> | 1293                                       | 1284.3                                     |
|          | v <sub>19</sub> | 1079                                       | 1069.4                                     |
|          | v <sub>20</sub> | 935                                        | 924.6                                      |
|          | v <sub>21</sub> | 664                                        | 668.3                                      |

<sup>a</sup>The theoretical frequencies are calculated at the B3LYP/6-311++G\*\* level of theory.

<sup>b</sup>The harmonic frequencies are from reference 9, calculated at the fc-CCSD(T)/ANO level of theory.



**Table S5.** The theoretical frequencies of imidazolyl.

| Symmetry | Mode            | $\omega$ (cm <sup>-1</sup> ) <sup>a</sup> |
|----------|-----------------|-------------------------------------------|
| a1       | v <sub>1</sub>  | 3231                                      |
|          | v <sub>2</sub>  | 3218                                      |
|          | v <sub>3</sub>  | 1436                                      |
|          | v <sub>4</sub>  | 1313                                      |
|          | v <sub>5</sub>  | 1166                                      |
|          | v <sub>6</sub>  | 982                                       |
|          | v <sub>7</sub>  | 919                                       |
| a2       | v <sub>8</sub>  | 874                                       |
|          | v <sub>9</sub>  | 560                                       |
| b1       | v <sub>10</sub> | 867                                       |
|          | v <sub>11</sub> | 756                                       |
|          | v <sub>12</sub> | 511                                       |
| b2       | v <sub>13</sub> | 3205                                      |
|          | v <sub>14</sub> | 1523                                      |
|          | v <sub>15</sub> | 1289                                      |
|          | v <sub>16</sub> | 1188                                      |
|          | v <sub>17</sub> | 1016                                      |
|          | v <sub>18</sub> | 780                                       |

<sup>a</sup>The theoretical frequencies are calculated at the B3LYP/6-311++G\*\* level of theory. These data are the same as those reported in ref. 10 computed at the same level of theory.

**Table S6.** The theoretical frequencies of 2-pyrrolyl.

| Symmetry | Mode            | $\omega$ (cm <sup>-1</sup> ) <sup>a</sup> | $\omega$ (cm <sup>-1</sup> ) <sup>b</sup> |
|----------|-----------------|-------------------------------------------|-------------------------------------------|
| a'       | v <sub>1</sub>  | 3675                                      | 3695.4                                    |
|          | v <sub>2</sub>  | 3263                                      | 3295.3                                    |
|          | v <sub>3</sub>  | 3258                                      | 3286.9                                    |
|          | v <sub>4</sub>  | 3228                                      | 3259.1                                    |
|          | v <sub>5</sub>  | 1549                                      | 1562.9                                    |
|          | v <sub>6</sub>  | 1453                                      | 1460.8                                    |
|          | v <sub>7</sub>  | 1403                                      | 1412.6                                    |
|          | v <sub>8</sub>  | 1359                                      | 1373.8                                    |
|          | v <sub>9</sub>  | 1252                                      | 1245.7                                    |
|          | v <sub>10</sub> | 1170                                      | 1166.8                                    |
|          | v <sub>11</sub> | 1103                                      | 1103.8                                    |
|          | v <sub>12</sub> | 1057                                      | 1060.2                                    |
|          | v <sub>13</sub> | 1022                                      | 1020.7                                    |
|          | v <sub>14</sub> | 888                                       | 878.9                                     |
|          | v <sub>15</sub> | 855                                       | 846.0                                     |
| a''      | v <sub>16</sub> | 856                                       | 842.0                                     |
|          | v <sub>17</sub> | 753                                       | 750.0                                     |
|          | v <sub>18</sub> | 683                                       | 695.7                                     |
|          | v <sub>19</sub> | 616                                       | 610.6                                     |
|          | v <sub>20</sub> | 455                                       | 499.3                                     |
|          | v <sub>21</sub> | 292                                       | 325.8                                     |

<sup>a</sup>The theoretical frequencies are calculated at the B3LYP/6-311++G\*\* level of theory.

<sup>b</sup>The harmonic frequencies are from reference 9, calculated at the fc-CCSD(T)/ANO level of theory.

## References

- 1 L. S. Wang, *J. Chem. Phys.*, 2015, **143**, 040901.
- 2 L. S. Wang, C. F. Ding, X. B. Wang and S. E. Barlow, *Rev. Sci. Instrum.*, 1999, **70**, 1957–1966.
- 3 X. B. Wang and L. S. Wang, *Rev. Sci. Instrum.*, 2008, **79**, 073108.
- 4 I. León, Z. Yang, H. T. Liu and L. S. Wang, *Rev. Sci. Instrum.*, 2014, **85**, 083106.
- 5 G. A. Garcia, L. Nahon and I. Powis, *Rev. Sci. Instrum.*, 2004, **75**, 4989–4996.
- 6 V. Dribinski, A. Ossadtchi, V. A. Mandelshtam and H. Reisler, *Rev. Sci. Instrum.*, 2002, **73**, 2634–2642.
- 7 M. J. Frisch, G. W. Trucks, H. B. Schlegel, G. E. Scuseria, M. A. Robb, J. R. Cheeseman, G. Scalmani, V. Barone, G. A. Petersson, H. Nakatsuji, X. Li, M. Caricato, A. Marenich, J. Bloino, B. G. Janesko, R. Gomperts, B. Mennucci, H. P. Hratchian, J. V. Ortiz, A. F. Izmaylov, J. L. Sonnenberg, D. Williams-Young, F. Ding, F. Lipparini, F. Egidi, J. Goings, B. Peng, A. Petrone, T. Henderson, D. Ranasinghe, V. G. Zakrzewski, J. Gao, N. Rega, G. Zheng, W. Liang, M. Hada, M. Ehara, K. Toyota, R. Fukuda, J. Hasegawa, M. Ishida, T. Nakajima, Y. Honda, O. Kitao, H. Nakai, T. Vreven, K. Throssell, J. A. Jr. Montgomery, J. E. Peralta, F. Ogliaro, M. Bearpark, J. J. Heyd, E. Brothers, K. N. Kudin, V. N. Staroverov, T. Keith, R. Kobayashi, J. Normand, K. Raghavachari, A. Rendell, J. C. Burant, S. S. Iyengar, J. Tomasi, M. Cossi, J. M. Millam, M. Klene, C. Adamo, R. Cammi, J. W. Ochterski, R. L. Martin, K. Morokuma, O. Farkas, J. B. Foresman and D. J. Fox, Gaussian 09, Revision D.01, Gaussian, Inc., Wallingford CT, 2016.
- 8 I. Pugliesi and K. Müller-Dethlefs, *J. Phys. Chem. A*, 2006, **110**, 4657–4667.
- 9 S. L. Johansen, Z. Xu, J. H. Westerfield, A. C. Wannemacher and K. N. Crabtree, *J. Phys. Chem. A*, 2021, **125**, 1257–1268.
- 10 A. J. Gianola, T. Ichino, R. L. Hoenigman, S. Kato, V. M. Bierbaum and W. C. Lineberger, *J. Phys. Chem. A*, 2005, **109**, 11504–11514.
